# 1 **Evolving cartilage strain with pain progression and gait: a longitudinal** 2 **study post-ACL reconstruction at six and twelve months**

3 *Emily Y. Miller<sup>1</sup>, Timothy Lowe<sup>2</sup>, Hongtian Zhu<sup>2</sup>, Woowon Lee<sup>2</sup>, Pablo F. Argote<sup>2</sup>, Danielle*  
4 *Dresdner<sup>1</sup>, James Kelly<sup>1</sup>, Rachel M. Frank<sup>3</sup>, Eric McCarty<sup>3</sup>, Jonathan Bravman<sup>3</sup>, Daniel Stokes<sup>3</sup>,*  
5 *Nancy C. Emery<sup>4</sup>, Corey P. Neu<sup>1,2,5,\*</sup>*

6 <sup>1</sup> *Biomedical Engineering Program, University of Colorado Boulder, Boulder, CO, USA*

7 <sup>2</sup> *Paul M. Rady Department of Mechanical Engineering, University of Colorado Boulder, Boulder,*  
8 *CO, USA*

9 <sup>3</sup> *CU Sports Medicine; Department of Orthopedics, University of Colorado Anschutz Medical*  
10 *Campus, Aurora, CO, USA*

11 <sup>4</sup> *Department of Ecology and Evolutionary Biology, University of Colorado Boulder, Boulder, CO,*  
12 *USA*

13 <sup>5</sup> *BioFrontiers Institute, University of Colorado Boulder, Boulder, CO, USA*

14 *\* Corresponding Author:*

15

## 16 **Corresponding Author Contact:**

17 Corey P. Neu, PhD

18 [cpneu@colorado.edu](mailto:cpneu@colorado.edu)

19 303-492-7330

20 *1111 Engineering Drive, UCB 427, Paul M. Rady Department of Mechanical Engineering,*  
21 *University of Colorado Boulder, Boulder, CO, USA, 80309-0427*

22 **Funding information:** Financial support was provided by the National Institutes of Health (2  
23 R01 AR063712, and AR063712S1).

24 **Manuscript Type:** Original Research

25 **Word Count for Text:** 2432

26 **Data sharing statement:** Data generated or analyzed during the study are available from the  
27 corresponding author by request.

28 **Keywords:** Osteoarthritis, MRI, markerless human motion, joint and tissue degeneration,  
29 biomarkers.

30

31

32 **Abbreviated Title Page (Anonymized)**

33 **Evolving cartilage strain with pain progression and gait: a longitudinal**  
34 **study post-ACL reconstruction at six and twelve months**

35 **Manuscript Type:** Original Research

36

37 **Summary Statement:** Early post-ACL reconstruction changes in cartilage strain patterns,  
38 occurring between 6 and 12 months post-ACL surgery, are significantly correlated with increased  
39 pain and altered knee loading patterns, suggesting potential early markers of cartilage  
40 degeneration.

41

42 **Key Results:**

- 43 1. Increased axial and transverse strains in the tibial cartilage from 6 to 12 months post-ACL  
44 reconstruction were significantly correlated with increased pain, suggesting evolving  
45 changes in cartilage biomechanical properties over time.
- 46 2. Decreases in shear strain in inner femoral and central tibial cartilage regions were linked  
47 to increased pain, indicating alterations in joint loading patterns.
- 48 3. Decreases in shear strain in the inner femoral cartilage were significantly associated with  
49 decreased 12-month knee adduction moment (KAM), a surrogate for medial cartilage knee  
50 loading during walking.

51

52 **List of Abbreviations:**

53 ACL: Anterior Cruciate Ligament

54 ACL: Anterior Cruciate Ligament Reconstruction

55 OA: Osteoarthritis

56 qMRI: Quantitative Magnetic Resonance Imaging

57 dualMRI: displacements under applied load Magnetic Resonance Imaging

58 KAM: Knee adduction moment

59 KOOS: Knee Injury and Osteoarthritis Outcome Score

60 WOMAC: Western Ontario and McMaster Universities Arthritis Index

61 **Abstract (300 words or less, structured as follows)**

62 **Background:** Anterior cruciate ligament (ACL) injuries are prevalent musculoskeletal conditions  
63 often resulting in long-term degenerative outcomes such as osteoarthritis (OA). Despite surgical  
64 advances in ACL reconstruction, a significant number of patients develop OA within ten years  
65 post-surgery, providing a patient population that may present early markers of cartilage  
66 degeneration detectable using noninvasive imaging.

67 **Purpose:** This study aims to investigate the temporal evolution of cartilage strain and relaxometry  
68 post-ACL reconstruction using displacement under applied loading MRI and quantitative MRI.  
69 Specifically, we examined the correlations between MRI metrics and pain, as well as knee loading  
70 patterns during gait, to identify early candidate markers of cartilage degeneration.

71 **Materials and Methods:** Twenty-five participants (female/male = 15/10; average age = 25.6 yrs)  
72 undergoing ACL reconstruction were enrolled in a prospective longitudinal cohort study between  
73 2022 and 2023. MRI scans were conducted at 6- and 12-months post-surgery, assessing T2, T2\*,  
74 and T1 $\rho$  relaxometry values, and intratissue cartilage strain. Changes in pain were evaluated  
75 using standard outcome scores, and gait analysis assessed the knee adduction moment (KAM).  
76 Regressions were performed to evaluate relationships between MRI metrics in cartilage contact  
77 regions, patient-reported pain, and knee loading metrics.

78 **Results:** Increases in axial and transverse strains in the tibial cartilage were significantly  
79 correlated with increased pain, while decreases in shear strain were associated with increased  
80 pain. Changes in strain metrics were also significantly related to KAM at 12 months.

81 **Conclusions:** Changes in cartilage strain and relaxometry are related to heightened pain and  
82 altered knee loading patterns, indicating potential early markers of osteoarthritis progression.  
83 These findings underscore the importance of using advanced MRI for early monitoring in ACL-

84 reconstructed patients to optimize treatment outcomes, while also highlighting KAM as a  
85 modifiable intervention through gait retraining that may positively impact the evolution of cartilage  
86 health and patient pain.

87

## 88 **Introduction (no more than 400 words)**

89 Anterior cruciate ligament (ACL) injuries are a common orthopedic condition that can have  
90 long-term consequences for patients. Despite advances in ACL reconstructive surgical  
91 techniques, a significant number of patients develop osteoarthritis (OA) within ten years of ACL  
92 injury (1). Osteoarthritis is a degenerative joint disease characterized by cartilage degradation  
93 and structural changes impacting the entire knee joint. As this condition progresses, patients  
94 frequently experience knee pain, stiffness, and a lower quality of life, often necessitating total  
95 knee arthroplasty at later stages. Alterations in knee loading patterns are theorized to intensify  
96 joint degeneration as osteoarthritis develops (2–5). These biomechanical changes can trigger  
97 breakdown of the articular cartilage, as well as structural modifications like bone marrow edema,  
98 synovitis, and osteophyte formation within the joint. It is crucial to identify patients at high risk of  
99 future osteoarthritis early in the postoperative period, to allow intervention before irreparable  
100 damage occurs. However, our understanding of the underlying mechanisms that initiate cartilage  
101 degeneration following ACL injury and reconstruction, and how those differ on a personalized  
102 basis, is still incomplete.

103 Magnetic resonance imaging (MRI) has emerged as a promising modality that can provide  
104 insights beyond the conventional radiographic methods used to diagnose OA. Although existing  
105 semi-quantitative scoring systems provide morphological information about cartilage, they are  
106 unable to detect the subtle matrix alterations and biomechanical property changes that  
107 characterize early osteoarthritic cartilage (6–8). Recent research has employed quantitative MRI  
108 (qMRI) techniques and displacements under applied loading MRI (dualMRI) in healthy and ACL-  
109 reconstructed individuals to quantify intratissue strain and relaxometry values (9–12). Building  
110 upon this foundation, our study investigates the temporal evolution of cartilage strain and  
111 relaxometry in a clinical cohort undergoing ACL-reconstruction (ACLR). Through longitudinal  
112 assessment of dualMRI-derived strain and qMRI-derived relaxometry from 6 to 12 months post-

113 ACLR, and correlation with patient-reported outcomes and measures of knee loading through gait  
114 analysis, we aim to identify early markers of cartilage degeneration and their clinical implications  
115 as well as offer valuable insights into the progressive nature of cartilage remodeling. The study  
116 had three objectives. First, we studied the relationship between medial articular cartilage dualMRI-  
117 derived strains and qMRI relaxometry at 6- and 12-month post-ACLR. Second, we investigated  
118 how changes in participant pain are related to changes in MRI over this period. Third, in a subset  
119 of participants, we examined how strain changes functionally relate to human motion, using peak  
120 knee adduction moment (KAM) at 12-months as a surrogate for knee loading.

## 121 **Materials and Methods**

122 *Participants:* Between 2022 and 2023, participants were enrolled in a longitudinal cohort study at  
123 the University of Colorado Anschutz orthopedic clinic following unilateral ACL reconstructive  
124 surgery. The University of Colorado IRB approved the study, and all participants gave informed  
125 consent. Inclusion criteria included individuals aged 18 to 40 who had ACL surgery within three  
126 months of injury, with no prior symptomatic knee pathologies. Exclusion criteria included previous  
127 ACL surgery on either limb or cartilage chondral defect surgery. Participants who sustained further  
128 knee injuries between six- and twelve-months post-surgery were also excluded. The ACL  
129 reconstruction used either a bone-patella tendon-bone autograft or a quadriceps tendon autograft.  
130 Rehabilitation adherence was not tracked, but all followed the MOON ACL protocol (13). MRI  
131 scans were conducted at approximately six- and twelve-months post-surgery, before which they  
132 completed the Knee Injury and Osteoarthritis Outcome Score (KOOS) and Western Ontario and  
133 McMaster Universities Arthritis Index (WOMAC) questionnaires. Pain percent change was  
134 calculated by scaling and averaging the KOOS and WOMAC pain subscores from six to twelve  
135 months.

136 *Loading Protocol of Human Knee:* The study utilized a previously validated MRI-compatible  
137 loading apparatus to apply a compressive load to the tibiofemoral cartilage during the DENSE

138 sequence (12). This apparatus directly applied a load perpendicular to the ankle joint, inducing a  
139 varus moment at the knee, and causing the compressive force at the medial cartilage condyle  
140 equivalent to 0.5 times the participant's body weight. Due to the nature of the DENSE sequence,  
141 the loading was applied using a cyclic regime mimicking a walking cadence, with 1-second load  
142 and unload intervals (9,11,12).

143 *MRI Scanning Protocol and Processing:* The knee imaging protocol remained consistent  
144 throughout all scanning sessions. Initially, a fast gradient echo MR image sequence was utilized  
145 for localization, which was followed by a 3D double echo steady state (DESS) acquisition,  
146 quantitative T2, T2\*, and T1 $\rho$  measurements, and a displacement encoding with stimulated  
147 echoes (DENSE) sequence during cyclic varus load of the knee joint. Additionally, to reduce the  
148 viscoelastic effect of cartilage, participants underwent an eight-minute cyclic preconditioning load  
149 before DENSE acquisition (10,11,13). The imaging procedures were carried out using a Siemens  
150 3T Prisma MRI system equipped with a 15-channel quadrature knee coil. Segmentation of the  
151 cartilage into femoral and tibial regions of interest (ROIs) was achieved using a semi-automatic  
152 algorithm. Participants were excluded at this stage if motion or metal artifact obscured the medial  
153 cartilage ROI. Strain calculations, including Green-Lagrange axial, transverse, and shear strains,  
154 were determined from smoothed displacements using the deformation gradient tensor (13–17)  
155 within each ROI. For the six-month data set, cartilage ROIs were warped through standard  
156 nonrigid image registration using anatomical knee landmarks to align with those at twelve months  
157 for each participant (18). Subsequently, a pixel-wise percent change was calculated for each MRI  
158 metric and for each participant. Sub-regions were established within the ROIs based on cartilage  
159 contact, with identification and segmentation achieved by fitting a spline to the middle of the region  
160 of interest and then calculating the length of the spline from the most medial to the most lateral  
161 extents. Each spline was then divided into thirds in the medial to lateral direction to define the  
162 extent of each region, resulting in the identification of the most medial cartilage-cartilage contact

163 region, a central cartilage-cartilage contact region, and a more lateral cartilage-meniscus contact  
164 area (10,11). To conduct statistical analyses, raw and percent change averages for each MRI  
165 metric were computed within each cartilage subregion.

166 *Markerless motion capture and musculoskeletal simulation:* During their twelve-month visit, a  
167 subset of the participants were selected to undergo gait analysis. All 9 participants performed 3 over-  
168 ground walking trials at a self-selected pace. immediately prior to their MRI scan using OpenCap, a  
169 markerless motion capture system(19). OpenCap was sampled at 60Hz using 3 commercial iPads  
170 (iPad Pro, Apple Inc., Cupertino, CA, USA). The iPads were positioned 1.5m off the ground, 3m from  
171 the center of the capture area, and at  $\pm 45^\circ$  and  $0^\circ$ , where  $0^\circ$  faces the participant. A precision-  
172 manufactured, 720 x 540 mm checkerboard was used for computing the extrinsic parameters during  
173 OpenCap's camera calibration step, as per the operating procedures provided by OpenCap. After  
174 recording trials, data was uploaded to the cloud. Trial data then went through automated extraction,  
175 pose estimation, time synchronization, and 3D anatomical marker set derivation. 3D kinematics were  
176 then computed from marker trajectories using invers kinematics and a musculoskeletal model with  
177 biomechanical constraints(19–21). Finally, OpenCap estimated dynamics using muscle-driven  
178 tracking simulations of joint kinematics. Peak KAM was then evaluated during the loading phase.  
179 Technical details of OpenCap's software and processing can be found at [www.opencap.ai](http://www.opencap.ai) and  
180 reported in Uhlrich et al. "OpenCap: human movment dynamics from smartphone videos" (19). T-tests  
181 were used to determine that there were no differences in age, BMI, or patient-reported outcome pain  
182 scores between the subgroup of nine and the greater group of 25.

183 *Statistical Analysis:* Statistical analyses were carried out using SAS Version 9.4 (SAS Institute) with  
184 a 2-sided significance level of  $\alpha=0.05$  by author E.Y.M. Any data that did not meet the assumption of  
185 normality as determined by the Shapiro-Wilk test underwent logarithmic transformation using standard  
186 methods. Following this, the relationships between 6-month and 12-month MRI data within each  
187 cartilage subregion were assessed using simple linear regression (22). Additionally, the associations  
188 between changes in pain and MRI values for each cartilage subregion were evaluated using general



189 linear models. A separate model was developed for each MRI metric and subregion, with sex  
190 considered as a fixed categorical effect and BMI as a covariate. The residuals from each model were  
191 assessed to test for normality and homoskedasticity (23). General linear models were also employed  
192 to investigate the correlation between peak knee adduction moment and strain change in the subgroup  
193 that underwent gait analysis (23).

## 194 **Results**

195 *Participant characteristics:* In total, 27 participants took part in both the six-month and twelve-  
196 month scans. Two individuals were excluded from the study pool due to motion or metal artifact  
197 interference with the cartilage region of interest (Figure 1). Thus, the final sample size comprised  
198 25 participants, including 10 males and 15 females. For the six-month scan, the average  
199 participant age was  $25.6 \pm 5.8$  years, with a mean body mass index (BMI) of  $24.2 \pm 4.1$ . The  
200 demographic and surgical characteristics of the participants are detailed in Table 1. Notably, the  
201 subgroup chosen for OpenCap gait analysis encompassed 9 participants, consisting of 6 females  
202 and 3 males. Their average age was  $23.0 \pm 3.1$ , with an average BMI of  $26.33 \pm 6.1$ .

203 *Positive correlations observed between six-month and twelve-month MRI data:* The percentage  
204 change was mapped on a pixel level from six months to twelve months for each MRI metric (Figure  
205 4). There was a positive correlation between the six-month average shear strain in the femoral  
206 central contact area and the twelve-month femoral shear strains (Figure 2,  $p = 0.02$ ).  
207 Furthermore, positive correlations were observed for the axial strains in the tibial cartilage contact  
208 areas between the six-month and twelve-month values (Figure 2,  $p=0.01$ ,  $p =0.03$ , respectively).  
209 However, no other strain averages displayed significant correlations between their six-month and  
210 twelve-month values in any cartilage region. Relaxometry data as a whole exhibited stronger  
211 positive correlations between six and twelve month data than strain data. T2 and T2\* data showed  
212 positive correlations between six-month and twelve-month values in all subregions of the tibial

213 articular cartilage (Figure 3). No significant correlations in T1 $\rho$  values between time points were  
214 observed in any region other than the femoral central contact region. All other results are  
215 displayed in Figure 4.

216 *MRI changes and pain fluctuations between six and twelve months exhibit variable correlations:*

217 The pain percent change was determined through the scaling and averaging of the KOOS and  
218 WOMAC pain subscores from six to twelve months. Both unadjusted and adjusted regressions  
219 were performed for each cartilage subregion to explore the relationship between participants' pain  
220 change and strain change. The adjusted regressions, presented in Figure 4, controlled for sex  
221 and BMI. Four notable correlations were discovered in the analysis of strain data. Specifically, in  
222 the inner-most tibial cartilage subregion, it was found that increases in axial and transverse strains  
223 between six months and twelve months were associated with increased pain (Figure 4,  $p = 0.007$ ,  
224  $p = 0.045$ , respectively). Conversely, an opposite trend was observed in shear strain. Decreases  
225 in shear strain in the inner femoral and central tibial cartilage subregions were linked to increased  
226 pain (Figure 4,  $p = 0.032$ ,  $p = 0.038$ , respectively). Notably, no significant correlations were  
227 observed in the outer cartilage-meniscal region, as well as with any qMRI data.

228 *Correlations with the twelve-month knee adduction moment vary by MRI metric:* During the

229 loading phase of gait analysis, we calculated the peak KAM for each participant. We conducted  
230 both unadjusted and adjusted regressions for each cartilage subregion to investigate the  
231 relationship between changes in strain among participants and the 12-month KAM. The adjusted  
232 regressions, which are illustrated in Figure 6 for strain data, were controlled for sex and BMI. The  
233 analysis of strain data revealed three significant correlations. In the central tibial cartilage region,  
234 we observed that increases in axial strain were associated with decreased 12-month KAM (Figure  
235 5,  $p = 0.029$ ). Conversely, in the same subregion, we found that increases in transverse strain  
236 were linked to increased 12-month KAM (Figure 5,  $p = 0.043$ ). A similar trend was identified in the  
237 inner-most femoral cartilage subregion, where decreases in shear strain were associated with

238 increased KAM (Figure 5,  $p=0.043$ ). Notably, again we did not observe any significant correlations  
239 in the outer cartilage-meniscal region or with any qMRI data.

## 240 **Discussion**

241 In evaluating the onset of cartilage degeneration, a non-invasive method is critical for  
242 monitoring the pre-osteoarthritic cartilage state. Assessing cartilage mechanical and biochemical  
243 properties quantitatively could potentially serve as an early indicator of pre-osteoarthritic cartilage  
244 changes, which may relate to long-term joint health (24). First, we examined the relationship  
245 between medial articular cartilage strains derived from dualMRI as well as qMRI metrics at 6 and  
246 12 months post-ACLR. Second, we assessed how variations in participant pain correlate with  
247 changes in MRI metrics over this timeframe. Third, within a subset of participants, we explored  
248 the functional implications of strain changes on the peak KAM at 12 months, as quantified by  
249 markerless motion capture system. From these objectives. our study yielded three primary  
250 outcomes: 1. Increased axial and transverse strains in the tibial cartilage from 6 to 12 months  
251 post-ACL reconstruction were significantly correlated with increased pain. 2. Decreases in shear  
252 strain in the femoral and tibial cartilage were linked to increases in pain, highlighting the intricate  
253 connection between complex biomechanical alterations and cartilage health. 3. Early post-  
254 reconstruction regional strain changes were found to be related with knee adduction moment  
255 patterns in a representative subgroup population. Our results imply that early post-reconstruction  
256 strain patterns are critical for predicting long-term cartilage health.

257 Our findings align with previous studies that highlight the importance of biomechanical  
258 factors in cartilage health (9–14,16,17,25). The use of qMRI and dualMRI techniques provided  
259 detailed insights into cartilage strain and relaxometry, offering a more comprehensive  
260 understanding of early cartilage changes compared to conventional imaging methods.  
261 Additionally, our finding that lower 12-month KAM is associated with decreases in femoral shear  
262 strain is supported by other findings(26). Previous work has shown that frontal plane knee

263 kinematics in walking in participants with post-traumatic OA vs non-traumatic OA differs (26).  
264 Mechanistically, knee unloading after ACLR may shift the location and magnitude of force applied  
265 to the cartilage during gait, which may disrupt the structural health of cartilage, leading to  
266 alterations in regional strain patterns observed via dualMRI (27,28). The association between  
267 decreased shear strain in the femoral cartilage contact region and increased pain may suggest  
268 that altered load distribution and cartilage-cartilage contact patterns potentially exacerbate friction  
269 within the joint and lead to pain. Conversely, the relationship between increased transverse and  
270 axial strains in the tibial contact area and increased pain could indicate that there are concentrated  
271 stresses on the cartilage, contributing to pain and cartilage degradation over time. Additionally,  
272 tibial cartilage experiences significant compression during weight-bearing activities, making axial  
273 and transverse strains crucial for assessing its mechanical response post-ACLR. Femoral  
274 cartilage, subjected to shear forces during knee movement, highlights the importance of shear  
275 strain in evaluating its structural integrity over time. Lower KAM impulse at 1 month post-  
276 reconstruction is associated with longer T2 relaxation times at 2 years post-surgery, possibly  
277 indicating poorer cartilage health (29). However, other studies have shown that increases in joint  
278 loading are associated with later presence of OA (30). It is unknown whether initial underloading  
279 can lead to progressive overloading or whether it is possible that both lower and higher loads in  
280 cartilage may lead to harmful cartilage changes. In our work, the association between increased  
281 pain, decreased KAM and specific strain changes indicates a bidirectional relationship where pain  
282 may lead to altered gait and further cartilage degradation, or early cartilage changes may increase  
283 joint stress and pain, leading to changes in gait.

284         Modifying the KAM offers a promising strategy for the reduction of pain and alteration of  
285 cartilage mechanical properties in individuals with osteoarthritis, in particular following ACLR.  
286 Excessive KAM during gait increases the load on the medial compartment of the knee, possibly  
287 exacerbating cartilage degradation as well as pain (28). In particular, subject-specific gait  
288 modifications that modify the foot progression (e.g., toe-in, toe-out) angle have been shown to

289 reduce peak KAM more than uniformly assigned modifications (31). However, much of the work  
290 evaluating gait modifications has been performed in a different patient cohort (e.g., age-related  
291 OA), and further work is required to assess the long-term and interventional efficacy of gait  
292 modifications in post-traumatic OA, especially in the short-term period one to two years post ACL  
293 reconstruction.

294 Several limitations of this study should be acknowledged. The sample size of 25  
295 participants is relatively small, potentially affecting the generalizability of the results. The same  
296 limitation can be applied to the sample size of the gait subset as well. Variability in participant  
297 characteristics, such as age, BMI, and rehabilitation adherence, could influence outcomes,  
298 although the use of adjusted regressions should allow for some control over introduced variability  
299 from covariate data. Additionally, patient-reported outcomes like pain assessments are subjective  
300 and may not accurately reflect underlying cartilage health. Future studies with larger, more diverse  
301 cohorts and objective measures of pain and function are necessary to validate these findings.

302 In conclusion, our study underscores the significant impact of altered knee loading on  
303 cartilage material properties post-ACLR. The observed regional strain changes and their  
304 associations with pain and gait mechanics emphasize the need for early monitoring and  
305 intervention to prevent long-term joint degeneration. Advances in qMRI and dualMRI techniques  
306 hold promise for detecting early cartilage changes and guiding personalized treatment strategies  
307 to improve outcomes for ACLR patients. Future research should focus on larger patient cohorts  
308 to further elucidate the mechanisms underlying cartilage degeneration, and KAM as a modifiable  
309 intervention through gait retraining that may positively impact the evolution of cartilage health and  
310 patient pain.

311

## 312 **Acknowledgments**

313 Financial support was provided by the National Institutes of Health (2 R01 AR063712 and  
314 AR063712S1). The funder of the study had no role in study design, data collection, data analysis,  
315 data interpretation, or writing of the report.

316 The authors are thankful for MRI technical support from Teryn S. Wilkes at the Intermountain  
317 Neuroimaging Consortium at University of Colorado Boulder.

318

## 319 References

- 320 1. Patterson BE, Culvenor AG, Barton CJ, Guermazi A, Stefanik JJ, Crossley KM. Patient-reported  
321 outcomes 1 to 5 years after ACL reconstruction: effect of combined injury, and associations  
322 with MRI-defined osteoarthritis features. *Arthritis Care Res (Hoboken)*. NIH Public Access;  
323 2020;72(3):412–422. doi: 10.1002/ACR.23854.
- 324 2. Buck AN, Lisee CM, Bjornsen ES, et al. Biomechanical Threshold Values for Identifying  
325 Clinically Significant Knee-Related Symptoms Six Months Following Anterior Cruciate  
326 Ligament Reconstruction. *J Athl Train*. *J Athl Train*; 2024; doi: 10.4085/1062-6050-0562.23.
- 327 3. Chu CR, Williams AA, Erhart-Hledik JC, Titchenal MR, Qian Y, Andriacchi TP. Visualizing pre-  
328 osteoarthritis: Integrating MRI UTE-T2\* with mechanics and biology to combat  
329 osteoarthritis—The 2019 Elizabeth Winston Lanier Kappa Delta Award. *Journal of*  
330 *Orthopaedic Research*. Wiley; 2021;jor.25045. doi: 10.1002/jor.25045.
- 331 4. Williams JR, Neal K, Alfayyadh A, et al. Knee cartilage T<sub>2</sub> relaxation times 3 months after ACL  
332 reconstruction are associated with knee gait variables linked to knee osteoarthritis. *Journal*  
333 *of Orthopaedic Research*. Wiley; 2021;jor.25043. doi: 10.1002/jor.25043.
- 334 5. Williams AA, Erhart-Hledik JC, Asay JL, et al. Patient-Reported Outcomes and Knee  
335 Mechanics Correlate With Patellofemoral Deep Cartilage UTE-T2\* 2 Years After Anterior  
336 Cruciate Ligament Reconstruction. . doi: 10.1177/0363546520982608.
- 337 6. Guermazi A, Alizai H, Crema MD, Trattinig S, Regatte RR, Roemer FW. Compositional MRI  
338 techniques for evaluation of cartilage degeneration in osteoarthritis. *Osteoarthritis Cartilage*.  
339 W.B. Saunders Ltd; 2015. p. 1639–1653. doi: 10.1016/j.joca.2015.05.026.
- 340 7. Jarraya M, Hayashi D, Roemer FW, Guermazi A. MR imaging-based semi-quantitative  
341 methods for knee osteoarthritis. *Magnetic Resonance in Medical Sciences*. 2016;15(2):153–  
342 164. doi: 10.2463/mrms.rev.2015-0058.
- 343 8. Hunter DJ, Guermazi A, Lo GH, et al. Evolution of semiquantitative whole joint assessment of  
344 knee OA: MOAKS (MRI Osteoarthritis Knee Score). *Osteoarthritis and cartilage / OARS,*  
345 *Osteoarthritis Research Society*. NIH Public Access; 2011;19(8):990. doi:  
346 10.1016/J.JOCA.2011.05.004.
- 347 9. Miller EY, Lee W, Lowe T, et al. MRI-derived Articular Cartilage Strains Predict Patient-  
348 Reported Outcomes Six Months Post Anterior Cruciate Ligament Reconstruction. medRxiv.  
349 Cold Spring Harbor Laboratory Press; 2024;2024.04.27.24306484. doi:  
350 10.1101/2024.04.27.24306484.
- 351 10. Lee W, Miller EY, Zhu H, Schneider SE, Reiter DA, Neu CP. Multi-frame biomechanical and  
352 relaxometry analysis during in vivo loading of the human knee by spiral dualMRI and  
353 compressed sensing. *Magn Reson Med*. John Wiley & Sons, Ltd; 2023;90(3):995–1009. doi:  
354 10.1002/MRM.29690.

- 355 11. Lee W, Miller EY, Zhu H, Luetkemeyer CM, Schneider SE, Neu CP. High frame rate  
356 deformation analysis of knee cartilage by spiral dualMRI and relaxation mapping. *Magn*  
357 *Reson Med*. John Wiley & Sons, Ltd; 2023;89(2):694–709. doi: 10.1002/MRM.29487.
- 358 12. Zhu H, Miller E, Lee W, Wilson R, Neu CP. In Vivo Human Knee Varus-Valgus Loading  
359 Apparatus for Analysis of Mri-Based Intratissue Strain and Relaxometry. doi:  
360 10.2139/SSRN.4569548.
- 361 13. Chan DD, Cai L, Butz KD, Trippel SB, Nauman EA, Neu CP. In vivo articular cartilage  
362 deformation: Noninvasive quantification of intratissue strain during joint contact in the  
363 human knee. *Sci Rep*. Nature Publishing Group; 2016;6(1):1–14. doi: 10.1038/srep19220.
- 364 14. Chan DD, Neu CP. Transient and microscale deformations and strains measured under  
365 exogenous loading by noninvasive magnetic resonance. *PLoS One*. *PLoS One*; 2012;7(3). doi:  
366 10.1371/journal.pone.0033463.
- 367 15. Chan DD, Neu CP. Probing articular cartilage damage and disease by quantitative magnetic  
368 resonance imaging. *J R Soc Interface*. Royal Society; 2013. doi: 10.1098/rsif.2012.0608.
- 369 16. Chan DD, Neu CP, Hull ML. Articular Cartilage Deformation Determined in an Intact  
370 Tibiofemoral Joint by Displacement-Encoded Imaging. *Magnetic resonance in medicine* :  
371 official journal of the Society of Magnetic Resonance in Medicine / Society of Magnetic  
372 Resonance in Medicine. NIH Public Access; 2009;61(4):989. doi: 10.1002/MRM.21927.
- 373 17. Chan DD, Cai L, Butz KD, et al. Functional MRI Can Detect Changes in Intratissue Strains in a  
374 Full Thickness and Critical Sized Ovine Cartilage Defect Model. *J Biomech*. NIH Public  
375 Access; 2018;66:18. doi: 10.1016/J.JBIOMECH.2017.10.031.
- 376 18. Xie D, Tanaka M, Pedoia V, et al. Baseline cartilage T1p and T2 predicted patellofemoral joint  
377 cartilage lesion progression and patient-reported outcomes after ACL reconstruction.  
378 *Journal of Orthopaedic Research*®. John Wiley & Sons, Ltd; 2023;41(6):1310–1319. doi:  
379 10.1002/JOR.25473.
- 380 19. Uhlich SD, Falisse A, Kidziński Ł, et al. OpenCap: Human movement dynamics from  
381 smartphone videos. *PLoS Comput Biol*. Public Library of Science; 2023;19(10):e1011462.  
382 doi: 10.1371/JOURNAL.PCBI.1011462.
- 383 20. Lai AKM, Arnold AS, Wakeling JM. Why are Antagonist Muscles Co-activated in My  
384 Simulation? A Musculoskeletal Model for Analysing Human Locomotor Tasks. *Ann Biomed*  
385 *Eng*. *Ann Biomed Eng*; 2017;45(12):2762–2774. doi: 10.1007/S10439-017-1920-7.
- 386 21. Rajagopal A, Dembia CL, DeMers MS, Delp DD, Hicks JL, Delp SL. Full-Body Musculoskeletal  
387 Model for Muscle-Driven Simulation of Human Gait. *IEEE Trans Biomed Eng*. *IEEE Trans*  
388 *Biomed Eng*; 2016;63(10):2068–2079. doi: 10.1109/TBME.2016.2586891.
- 389 22. Griebel AJ, Trippel SB, Emery NC, Neu CP. Noninvasive assessment of osteoarthritis severity  
390 in human explants by multicontrast MRI. *Magn Reson Med*. John Wiley and Sons Inc;  
391 2014;71(2):807–814. doi: 10.1002/mrm.24725.



- 392 23. Griebel AJ, Khoshgoftar M, Novak T, van Donkelaar CC, Neu CP. Direct noninvasive  
393 measurement and numerical modeling of depth-dependent strains in layered agarose  
394 constructs. *J Biomech. Elsevier*; 2014;47(9):2149–2156. doi:  
395 10.1016/J.JBIOMECH.2013.09.025.
- 396 24. Williams A, Winalski CS, Chu CR. Early articular cartilage MRI T2 changes after anterior  
397 cruciate ligament reconstruction correlate with later changes in T2 and cartilage thickness.  
398 *Journal of Orthopaedic Research. John Wiley & Sons, Ltd*; 2017;35(3):699–706. doi:  
399 10.1002/JOR.23358.
- 400 25. Miller RH, Krupenevich RL. Medial knee cartilage is unlikely to withstand a lifetime of running  
401 without positive adaptation: A theoretical biomechanical model of failure phenomena.  
402 *PeerJ. PeerJ Inc.*; 2020;8:e9676. doi: 10.7717/PEERJ.9676/FIG-8.
- 403 26. Diamond LE, Grant T, Uhrich SD. Osteoarthritis year in review 2023: Biomechanics.  
404 *Osteoarthritis Cartilage. W.B. Saunders*; 2024;32(2):138–147. doi:  
405 10.1016/J.JOCA.2023.11.015.
- 406 27. Williams JR, Neal K, Alfayyadh A, et al. Patellofemoral contact forces after ACL  
407 reconstruction: A longitudinal study. *J Biomech. Elsevier*; 2022;134:110993. doi:  
408 10.1016/J.JBIOMECH.2022.110993.
- 409 28. Williams JR, Neal K, Alfayyadh A, et al. Patellofemoral contact forces and knee gait  
410 mechanics 3 months after ACL reconstruction are associated with cartilage degradation 24  
411 months after surgery. *Osteoarthritis Cartilage. W.B. Saunders*; 2023;31(1):96–105. doi:  
412 10.1016/J.JOCA.2022.10.007.
- 413 29. Wellsandt E, Kallman T, Golightly Y, et al. Knee joint unloading and daily physical activity  
414 associate with cartilage T2 relaxation times 1 month after ACL injury. *J Orthop Res. J Orthop  
415 Res*; 2022;40(1):138–149. doi: 10.1002/JOR.25034.
- 416 30. Titchenal MR, Williams AA, Chehab EF, et al. Cartilage Subsurface Changes to Magnetic  
417 Resonance Imaging UTE-T2\* 2 Years After Anterior Cruciate Ligament Reconstruction  
418 Correlate With Walking Mechanics Associated With Knee Osteoarthritis. *Am J Sports Med.  
419 Am J Sports Med*; 2018;46(3):565–572. doi: 10.1177/0363546517743969.
- 420 31. Uhrich SD, Silder A, Beaupre GS, Shull PB, Delp SL. Subject-specific toe-in or toe-out gait  
421 modifications reduce the larger knee adduction moment peak more than a non-personalized  
422 approach. *J Biomech. NIH Public Access*; 2018;66:103. doi:  
423 10.1016/J.JBIOMECH.2017.11.003.

424

425

426 **Tables**

427 **Table I:** Participant demographic, surgical characteristics, and patient-reported outcomes within  
428 25 subjects included for all analyses.

| Variable                             | Value at Six-Month Scan | Value at Twelve-Month Scan |
|--------------------------------------|-------------------------|----------------------------|
| Age at scan date (years)             | 25.6 ± 5.8              | 26.2 ± 5.9                 |
| BMI (kg/m <sup>2</sup> )             | 23.5 ± 4.0              | 23.4 ± 4.0                 |
| Time since ACLR at MRI Scan (months) | 6.9 ± 1.2               | 12.9 ± 0.9                 |
| Sex                                  |                         |                            |
| Male                                 | 10 (40.0%)              | 10 (40.0%)                 |
| Female                               | 15 (60.0%)              | 15 (60.0%)                 |
| Graft Type                           |                         |                            |
| Bone-patellar tendon-bone autograft  | 22 (88%)                | 22 (88%)                   |
| Quadriceps tendon autograft          | 3 (12%)                 | 3 (12%)                    |
| KOOS Score                           | 75.4 ± 8.6              | 82.0 ± 10.0                |
| Symptoms                             | 82.7 ± 11.5             | 83.5 ± 13.2                |
| Pain                                 | 85.5 ± 7.8              | 87.6 ± 10.1                |
| Activities of Daily Living           | 94.8 ± 5.5              | 97.3 ± 3.7                 |
| Sports and Recreation                | 61.0 ± 16.2             | 74.4 ± 18.0                |
| Quality of Life                      | 53.2 ± 15.3             | 66.2 ± 14.9                |
| WOMAC Score                          | 6.8 ± 5.6               | 5 ± 7.6                    |
| Pain                                 | 1.0 ± 1.2               | 1.1 ± 1.7                  |
| Stiffness                            | 1.6 ± 1.2               | 1.0 ± 1.7                  |
| Physical Function                    | 4.2 ± 4.3               | 2.7 ± 4.7                  |
| MARS Score                           | 8.2 ± 5.3               | 9.2 ± 4.5                  |

429  
430 <sup>a</sup>Data are reported as mean ± SD, or n (%). All KOOS scores are on a 0-100 scale, with 0  
431 representing extreme knee problems. All WOMAC scores are on a scale of 0 to 96, with 96  
432 representing extreme knee problems. WOMAC subscore pain is scored from 0-20, stiffness from  
433 0 to 8, and physical function from 0 to 68. All MARS Scores are scaled from 0 to 16 with 16  
434 representing highly physically active individuals. BMI, body mass index. ACLR, anterior cruciate  
435 ligament reconstruction. KOOS, Knee Injury and Osteoarthritis Outcome Score. WOMAC,  
436 Western Ontario and McMaster Universities Osteoarthritis Index, MARS, Marx Activity Rating  
437 (MARS)

438

439 **Figures and Figure Legends**

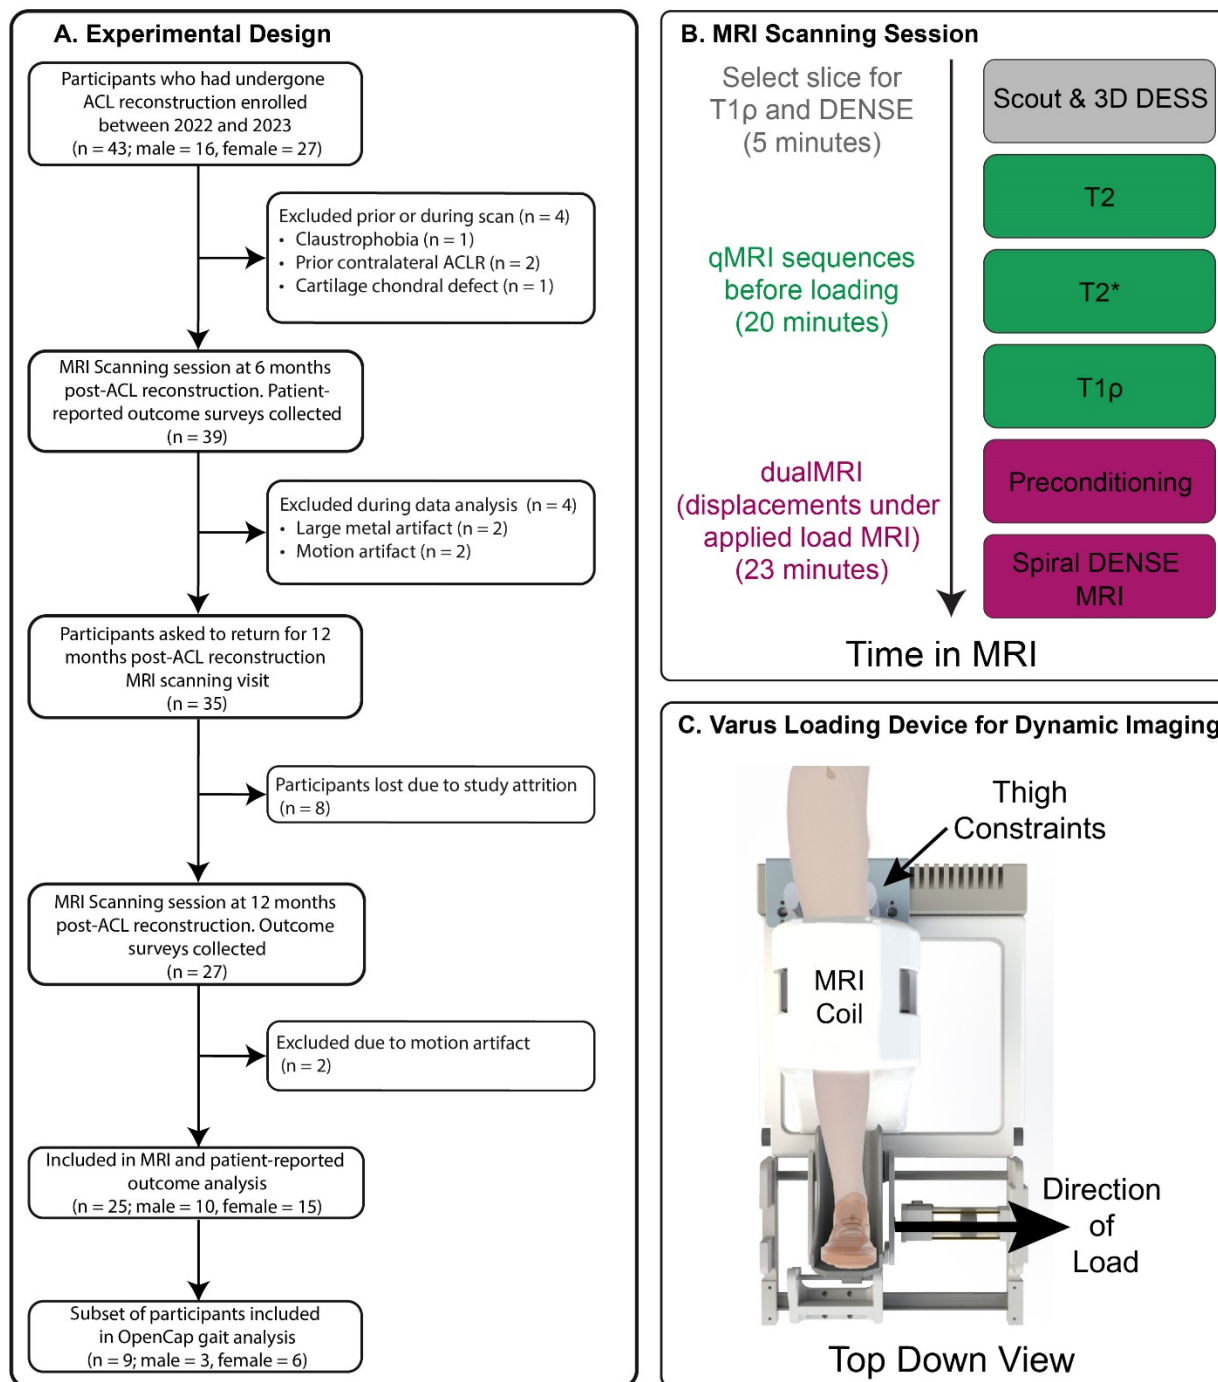

440

441 **Figure 1: Flow diagram of participant selection and inclusion criteria.** The experimental  
 442 design included recruiting in the orthopedic clinic, 43 participants who had received a unilateral

443 ACL reconstruction. Four participants were excluded prior to the first MRI scan at six months post-  
444 ACL reconstruction due to claustrophobia, prior ACLR on the contralateral limb, or cartilage  
445 chondral defect. After scanning, four more participants were excluded from analysis due to the  
446 presence of large metal artifact in the cartilage region of interest, or motion artifact that obscured  
447 analysis. All participants who participated in the scanning session at six -months post ACL  
448 reconstruction were invited back to participant in a second scan at twelve-months post ACL  
449 reconstruction. 27 participants elected to participate in this scanning session. Two participants  
450 were then excluded due to motion artifact. A subset of the 25 participants was selected to  
451 participate in gait analysis. B. The MRI scanning session was the same at both the six-month and  
452 twelve-month visits. The scanning session included a scout and 3D (double echo steady state  
453 (DESS) sequences to visualize knee anatomy and chose a slice that maximizes tibiofemoral  
454 contact for both DENSE and T1 $\rho$  acquisition. Relaxometry measurements (T2, T2\*, T1 $\rho$ ) were  
455 then acquired. C. To apply a cyclic load to the medial knee cartilage during DENSE acquisition,  
456 an MRI-compatible varus loading apparatus was used. To minimize the effect of cartilage  
457 viscoelasticity, 8 minutes of load were applied in a preconditioning period before DENSE  
458 acquisition. ACL, anterior cruciate ligament. MRI, magnetic resonance imaging.

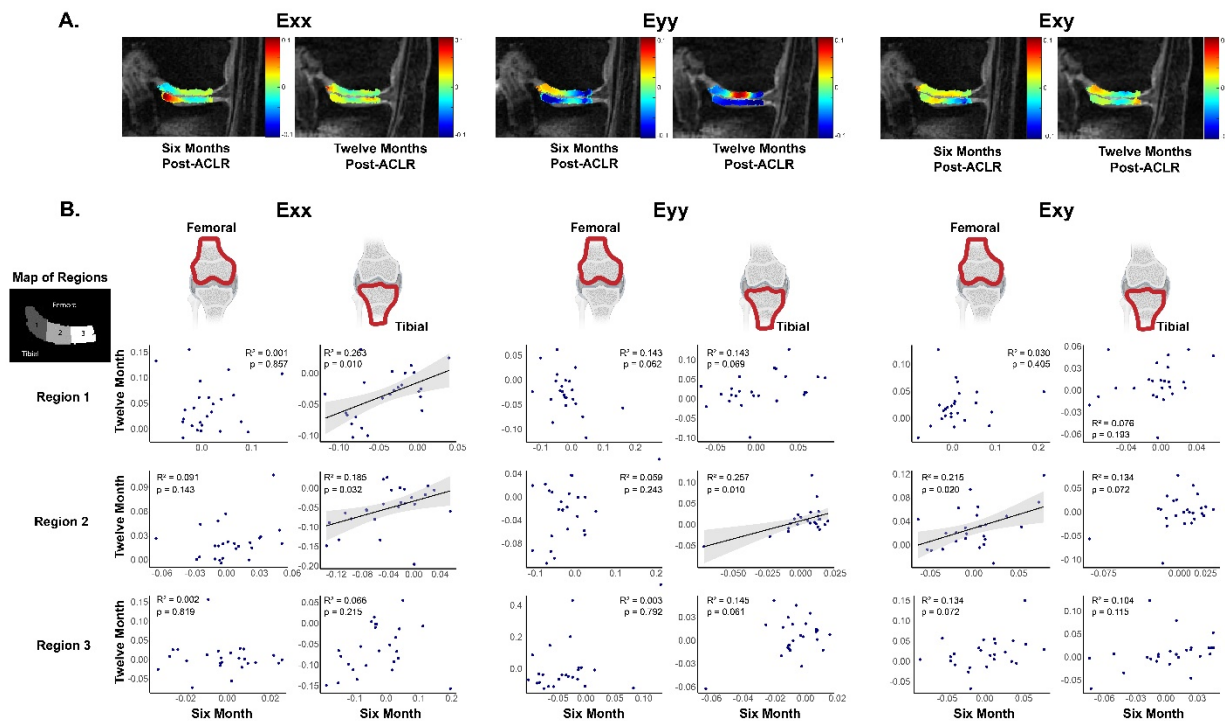

459

460 **Figure 2: Correlations between six- and twelve-months display variability in time-evolving**  
 461 **longitudinal strain patterns.** A. Representative images are shown of strain in a single participant  
 462 at 6 months and 12 months. B. The relationship of average strain values at six- and twelve-months  
 463 post-ACL reconstruction was evaluated. Most strain measures were not significantly correlated  
 464 between six-month and twelve-month values. Unadjusted regressions were calculated for the  
 465 averages in each cartilage subregion. Confidence intervals of 95% are shown in gray. Tibial  
 466 cartilage experiences significant compression during weight-bearing activities, making axial and  
 467 transverse strains crucial for assessing its mechanical response post-ACLR. Conversely, femoral  
 468 cartilage, subjected to shear forces during knee movement, highlights the importance of shear  
 469 strain in evaluating its structural integrity over time. These findings underscore the complexity of  
 470 cartilage remodeling dynamics post-ACL surgery.

471

472

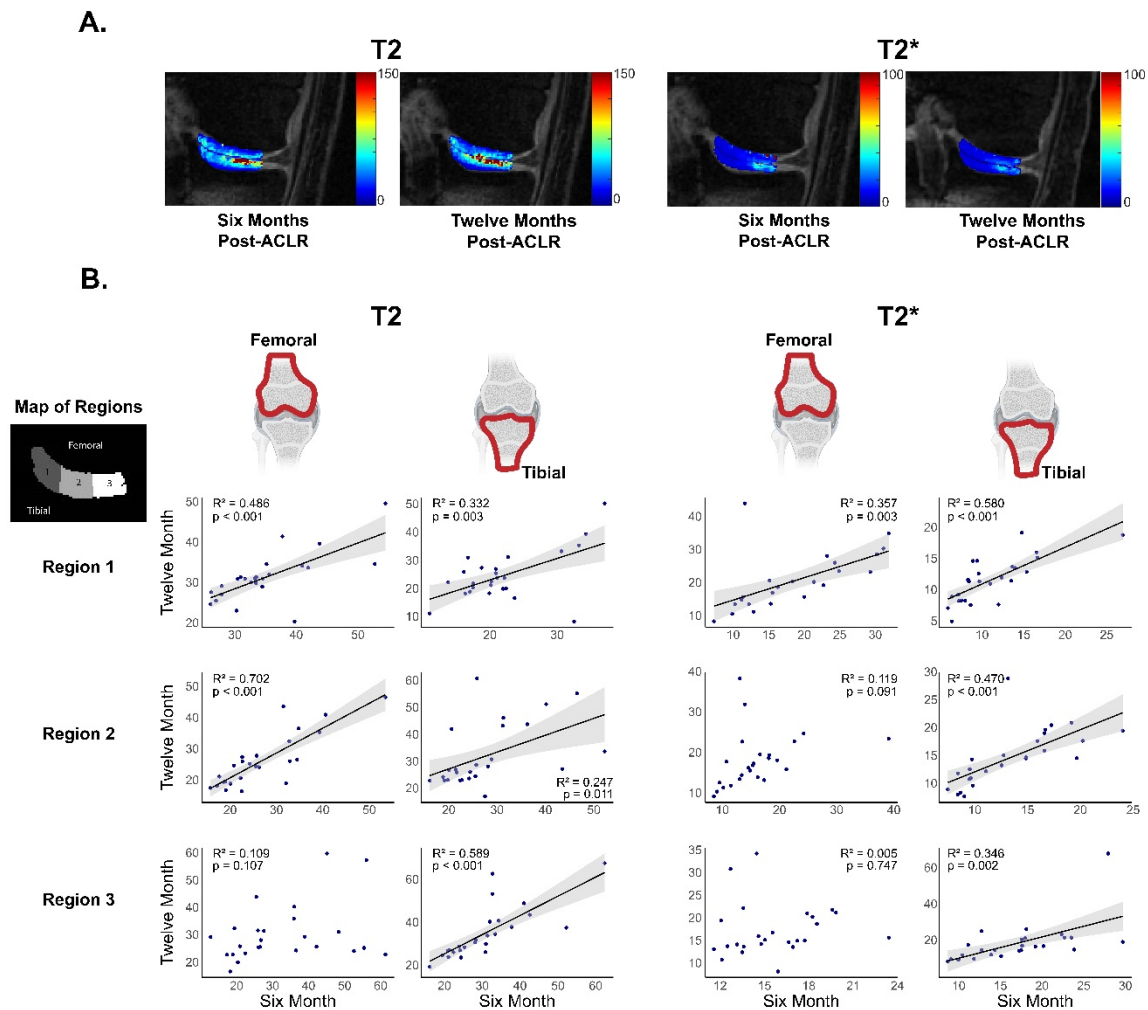

473

474 **Figure 3: Most relaxometry measures showed significant correlations between their values**  
475 **at six- and twelve-months post-ACLR.** Unadjusted regressions were conducted using average  
476 values from each cartilage subregion. Gray shading indicates 95% confidence intervals. The  
477 inclusion of specific relaxometry measures—T2, T2\*, and T1p MRI for both femoral and tibial  
478 cartilage—reflects their biochemical significance in assessing post-surgical cartilage health. The  
479 observed strong correlations suggest that biochemical changes may not yet be detectable over  
480 this time interval, underscoring the importance of long-term longitudinal monitoring.

**A. Changes in knee pain were compared to changes in strain**

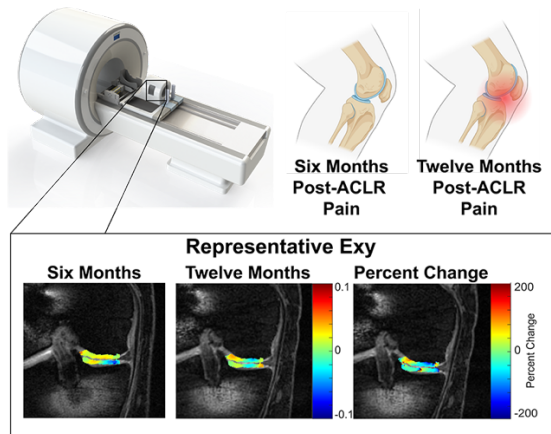

**B. Adjusted regressions found four significant relationships between change in pain and change in strain**

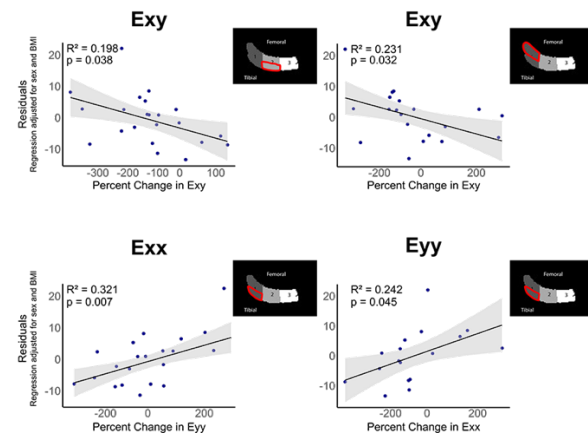

481

482 **Figure 4: Changes in regional strain patterns were significantly correlated with changes in**

483 **participant pain, with adjustments made for covariate data such as sex and BMI. Decreased**

484 shear strain in the femoral and tibial contact regions correlated with increased pain, whereas

485 increased transverse and axial strain in the tibial contact area also correlated with increased pain.

486 Decreased shear strain suggests altered load distribution and altered cartilage-cartilage contact

487 patterns, potentially exacerbating friction and leading to pain. Conversely, increased transverse

488 and axial strains in the tibial contact area could indicate increased mechanical loads on the

489 cartilage, contributing to pain and cartilage degradation over time. Adjusted regressions are

490 shown, which account for the variability introduced by covariate data such as sex and BMI. Strain

491 is displayed on the horizontal axis and adjusted regression for percent change in pain is displayed

492 on the vertical axis. The pain percent change was determined through the scaling and averaging

493 of the KOOS and WOMAC pain subscores from six to twelve months. No regressions were

494 significant in the outer cartilage-meniscal contact region in either the femoral or tibial cartilage.

495 Confidence intervals of 95% are shown in gray. See supplement Figure S1 for relaxometry data

496 and S2 for nonsignificant strain data.

497

**A. Changes in strain were compared to knee loading during gait**

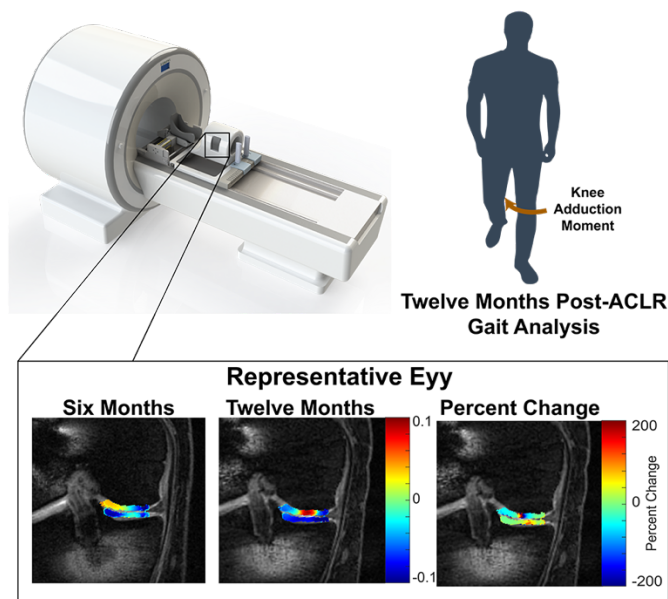

**B. Adjusted regressions found four significant relationships between knee adduction moment and change in strain**

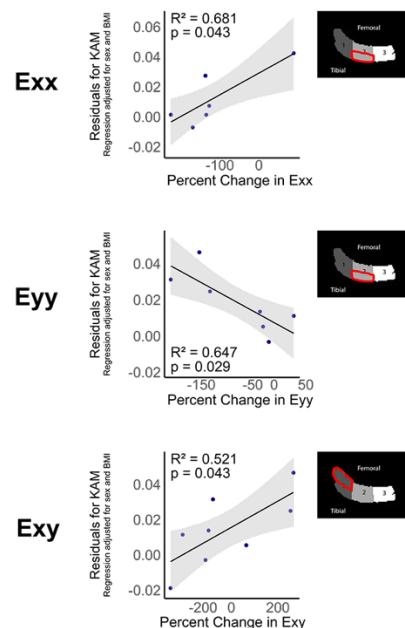

498

499 **Figure 5: Changes in regional strain patterns were significantly correlated with knee**  
500 **adduction moment.** Increases in shear strain in the femoral cartilage contact area were  
501 associated with higher knee adduction moments during gait, which was attributed to loss of joint  
502 stability and altered load distribution. Alternatively, decreases in axial strain in the tibial contact  
503 area of cartilage were correlated with higher knee adduction moments, likely due to realignment  
504 of forces through the joint during gait that increased the medial-lateral stress. These findings  
505 highlight the complex biomechanical relationships influencing knee joint dynamics and  
506 underscore the importance of understanding regional strain patterns using noninvasive imaging  
507 measures. Adjusted regressions are shown, which account for the variability introduced by  
508 covariate data such as sex and BMI. No regressions were significant in the outer cartilage-  
509 meniscal contact region in either the femoral or tibial cartilage. There were no significant  
510 regressions found with relaxometry data. Confidence intervals of 95% are shown in gray. All other  
511 (nonsignificant) data is shown in Figure S3.



512 **Strobe Checklist**

513 STROBE Statement—checklist of items that should be included in reports of observational  
514 studies

515

|                           | Item No | Recommendation                                                                                                                                                                                                                                                                                                                                                                                                                                                                 | a(N/A) |
|---------------------------|---------|--------------------------------------------------------------------------------------------------------------------------------------------------------------------------------------------------------------------------------------------------------------------------------------------------------------------------------------------------------------------------------------------------------------------------------------------------------------------------------|--------|
| <b>Title and abstract</b> |         |                                                                                                                                                                                                                                                                                                                                                                                                                                                                                |        |
|                           | 1       | (a) Indicate the study’s design with a commonly used term in the title or the abstract                                                                                                                                                                                                                                                                                                                                                                                         | yes    |
|                           |         | (b) Provide in the abstract an informative and balanced summary of what was done and what was found                                                                                                                                                                                                                                                                                                                                                                            | yes    |
| <b>Introduction</b>       |         |                                                                                                                                                                                                                                                                                                                                                                                                                                                                                |        |
| Background/rationale      | 2       | Explain the scientific background and rationale for the investigation being reported                                                                                                                                                                                                                                                                                                                                                                                           | yes    |
| Objectives                | 3       | State specific objectives, including any prespecified hypotheses                                                                                                                                                                                                                                                                                                                                                                                                               | yes    |
| <b>Methods</b>            |         |                                                                                                                                                                                                                                                                                                                                                                                                                                                                                |        |
| Study design              | 4       | Present key elements of study design early in the paper                                                                                                                                                                                                                                                                                                                                                                                                                        | yes    |
| Setting                   | 5       | Describe the setting, locations, and relevant dates, including periods of recruitment, exposure, follow-up, and data collection                                                                                                                                                                                                                                                                                                                                                | yes    |
| Participants              | 6       | (a) <i>Cohort study</i> —Give the eligibility criteria, and the sources and methods of selection of participants. Describe methods of follow-up<br><br><i>Case-control study</i> —Give the eligibility criteria, and the sources and methods of case ascertainment and control selection. Give the rationale for the choice of cases and controls<br><br><i>Cross-sectional study</i> —Give the eligibility criteria, and the sources and methods of selection of participants | yes    |
|                           |         | (b) <i>Cohort study</i> —For matched studies, give matching criteria and number of exposed and unexposed<br><br><i>Case-control study</i> —For matched studies, give matching criteria and the number of controls per case                                                                                                                                                                                                                                                     | yes    |

|                              |    |                                                                                                                                                                                                                                                                                                                   |     |
|------------------------------|----|-------------------------------------------------------------------------------------------------------------------------------------------------------------------------------------------------------------------------------------------------------------------------------------------------------------------|-----|
| Variables                    | 7  | Clearly define all outcomes, exposures, predictors, potential confounders, and effect modifiers. Give diagnostic criteria, if applicable                                                                                                                                                                          | yes |
| Data sources/<br>measurement | 8* | For each variable of interest, give sources of data and details of methods of assessment (measurement). Describe comparability of assessment methods if there is more than one group                                                                                                                              | yes |
| Bias                         | 9  | Describe any efforts to address potential sources of bias                                                                                                                                                                                                                                                         | yes |
| Study size                   | 10 | Explain how the study size was arrived at                                                                                                                                                                                                                                                                         | yes |
| Quantitative variables       | 11 | Explain how quantitative variables were handled in the analyses. If applicable, describe which groupings were chosen and why                                                                                                                                                                                      | yes |
| Statistical methods          | 12 | (a) Describe all statistical methods, including those used to control for confounding                                                                                                                                                                                                                             | yes |
|                              |    | (b) Describe any methods used to examine subgroups and interactions                                                                                                                                                                                                                                               | yes |
|                              |    | (c) Explain how missing data were addressed                                                                                                                                                                                                                                                                       | yes |
|                              |    | (d) <i>Cohort study</i> —If applicable, explain how loss to follow-up was addressed<br><br><i>Case-control study</i> —If applicable, explain how matching of cases and controls was addressed<br><br><i>Cross-sectional study</i> —If applicable, describe analytical methods taking account of sampling strategy | yes |
|                              |    | (e) Describe any sensitivity analyses                                                                                                                                                                                                                                                                             | yes |

517 **Supplemental Materials**

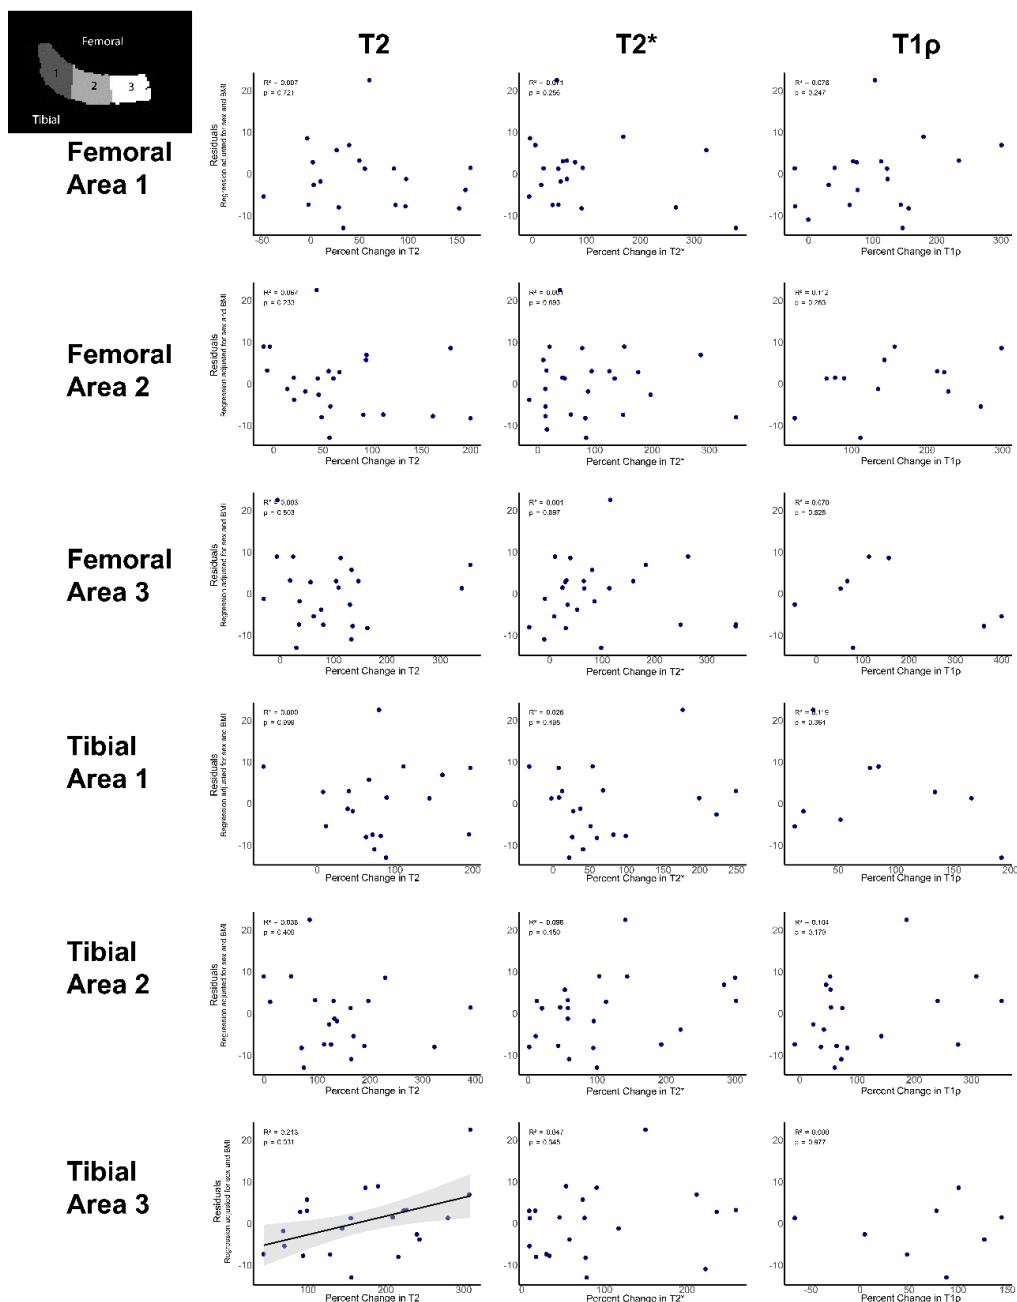

518

519 **Figure S1: Changes in regional relaxometry values were not significantly correlated with**

520 **changes in participant pain, with adjustments made for covariate data such as sex and**

521 **BMI. Only increased T2 values in the tibial cartilage-meniscal contact area displayed a significant**

522 **positive correlation with participant changes in pain. Increased T2 values could indicated higher**

523 water content and changes in collagen organization, signifying early signs of cartilage  
524 degeneration. Given that this region plays a crucial role in load transmission during weight-bearing  
525 activities, elevated T2 values may indicate that the cartilage is undergoing structural changes in  
526 response to increased mechanical stress. Adjusted regressions, adjusted for the variability  
527 introduced by covariate data such as sex and BMI are shown. Average relaxometry value is  
528 shown on the x-axis and adjusted regression for percent change in pain is shown on the y-axis.  
529 The pain percent change was determined through the scaling and averaging of the KOOS and  
530 WOMAC pain subscores from six to twelve months. Confidence intervals of 95% are shown in  
531 gray.

532

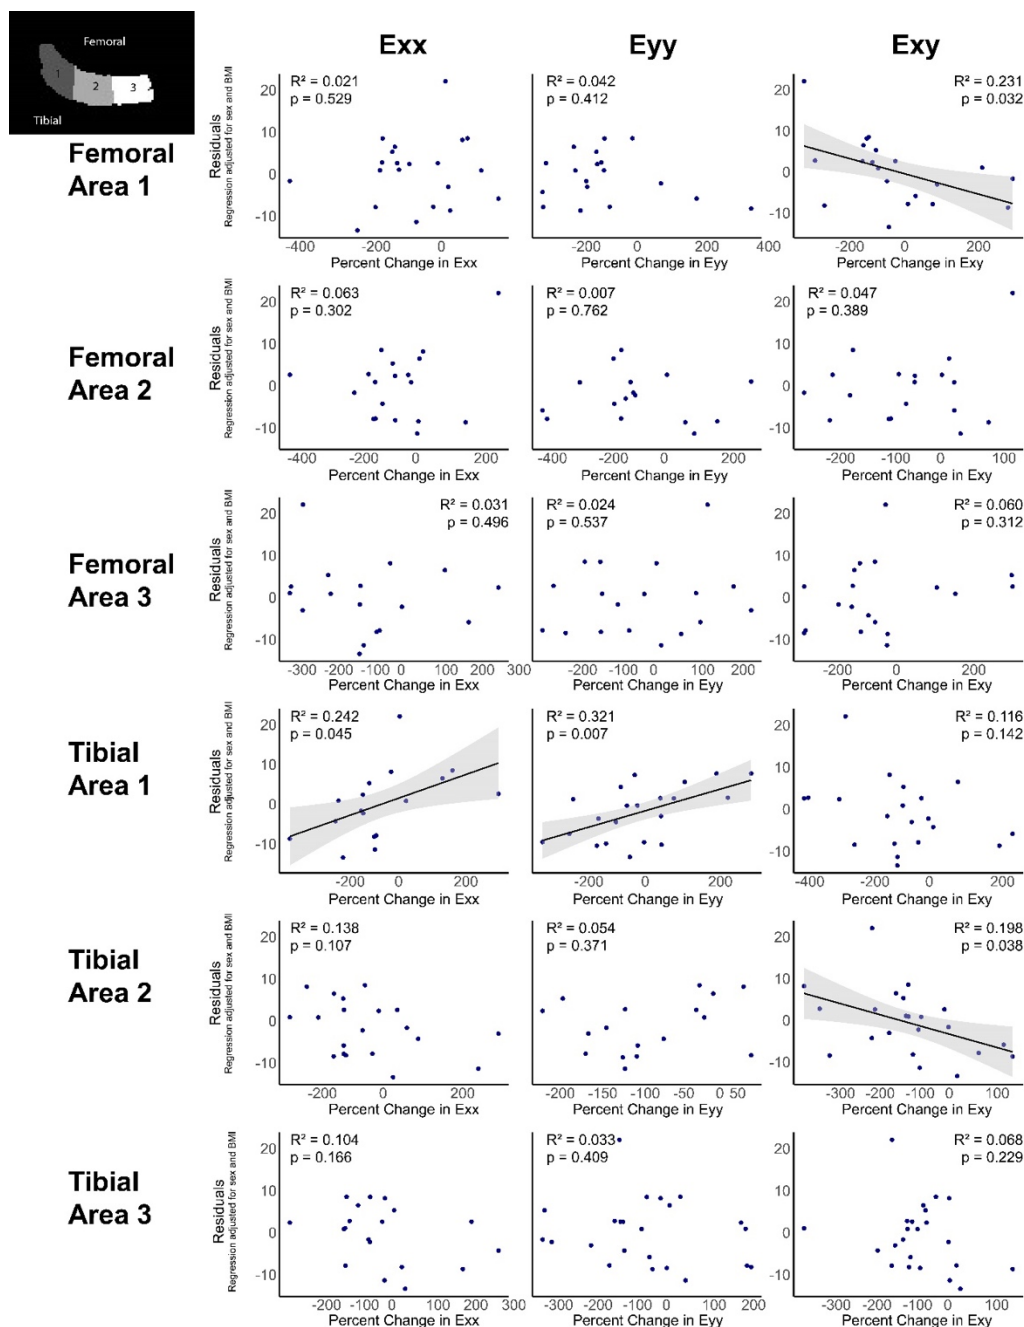

533

534 **Figure S2: Changes in regional strain patterns were significantly correlated with changes**  
 535 **in participant pain, with adjustments made for covariate data such as sex and BMI. All data,**  
 536 **both significant and insignificant is shown here, whereas only the significant relationships are**  
 537 **shown in Figure 4.**

538

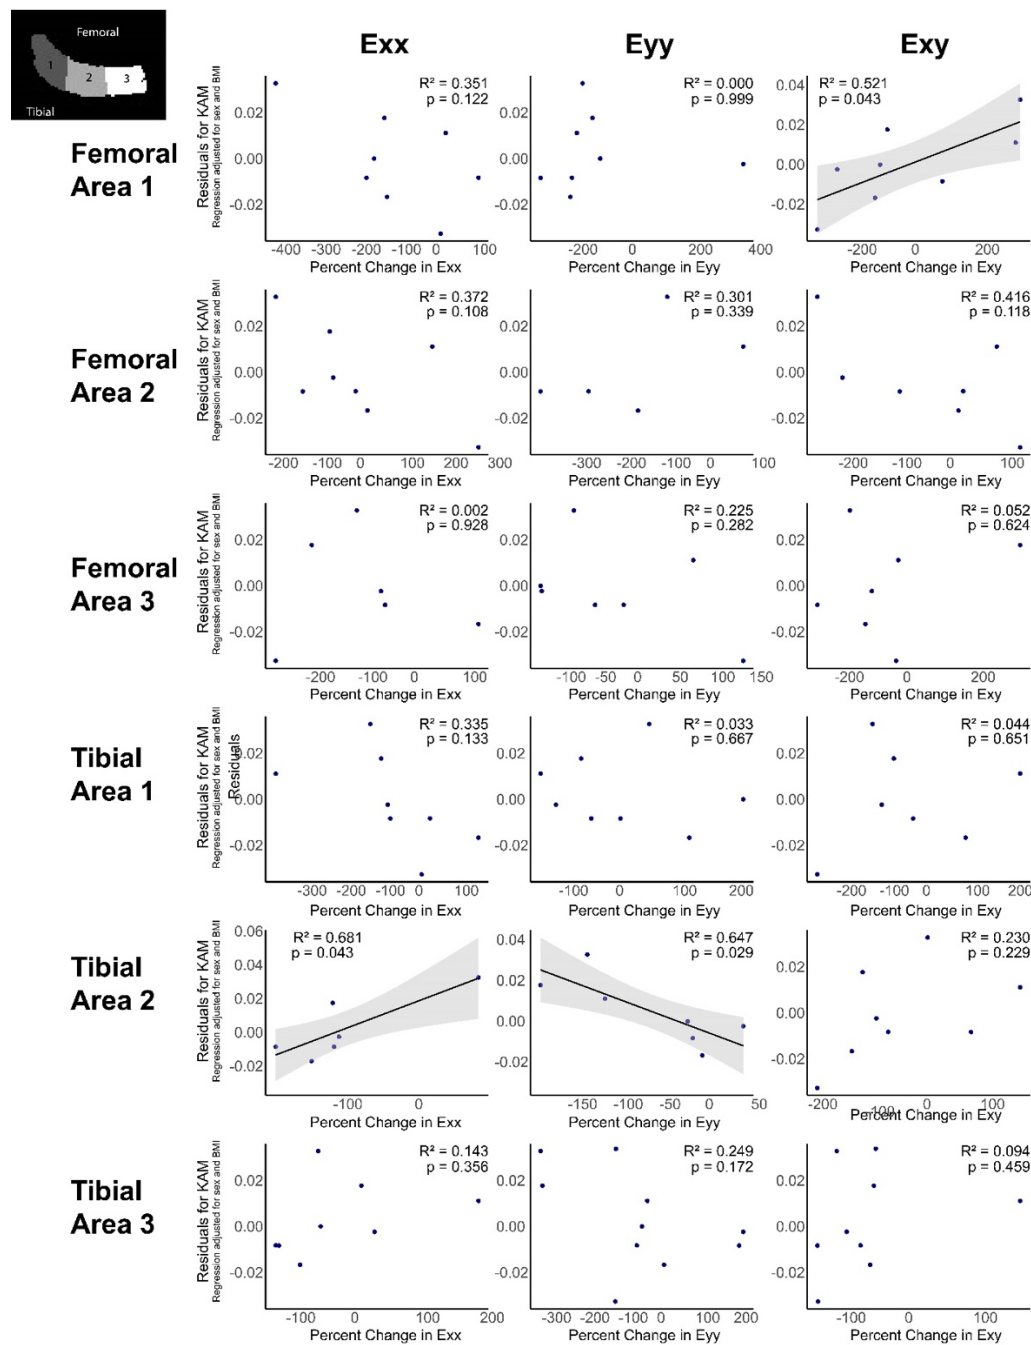

539

540 **Figure S3: Changes in regional strain patterns were significantly correlated with knee**  
 541 **adduction moment.** All data, both significant and insignificant is shown here, whereas only the  
 542 significant relationships are shown in Figure 5.
